# Supplementary material for: Cytokine-scavenging nanodecoys reconstruct osteoclast/osteoblast balance toward the treatment of postmenopausal osteoporosis
Source: PubMed Central journal article supplement — Sci Adv. 2021 Nov 24;7(48):eabl6432. doi: 10.1126/sciadv.abl6432 (PMC8612675; doi:10.1126/sciadv.abl6432), 2021-11-24
Supplement: sciadv.abl6432_sm.pdf [file sciadv.abl6432_sm.pdf]

Supplementary Materials for  
**Cytokine-scavenging nanodecoys reconstruct osteoclast/osteoblast balance  
toward the treatment of postmenopausal osteoporosis**

Yang Zhou, Yekun Deng, Zhongmin Liu, Mengyuan Yin, Mengying Hou, Ziyin Zhao,  
Xiaozhong Zhou, Lichen Yin\*

\*Corresponding author. Email: lcyin@suda.edu.cn

Published 24 November 2021, *Sci. Adv.* 7, eabl6432 (2021)  
DOI: 10.1126/sciadv.abl6432

**This PDF file includes:**

Figs. S1 to S20  
Tables S1 to S3

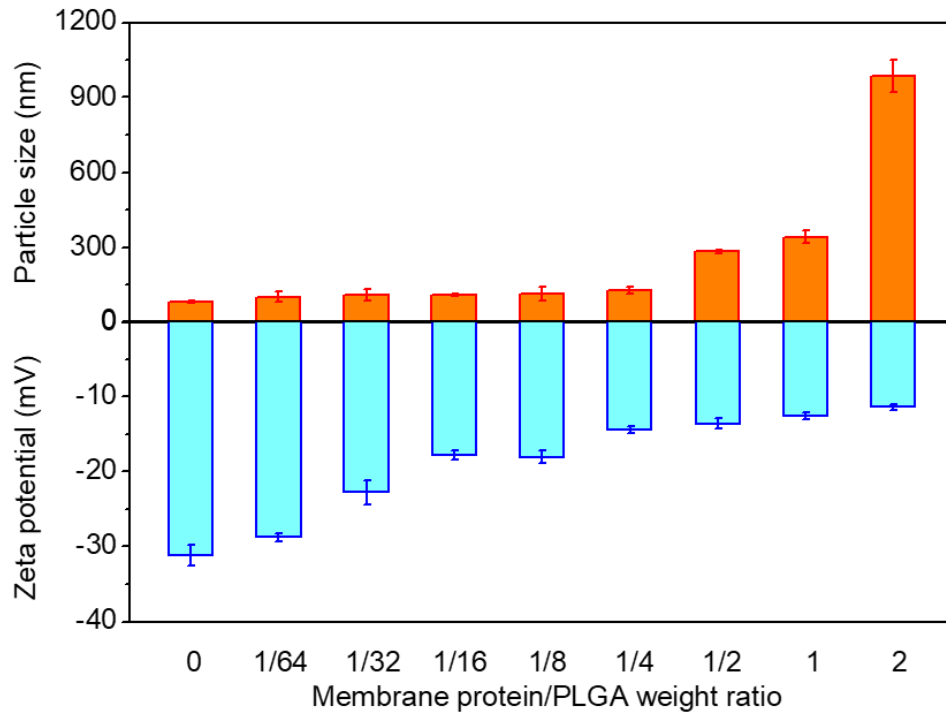

**Fig. S1.**

Particle size and zeta potential of RAW-PLGA nanodecoys at different membrane protein/PLGA weight ratios in water.

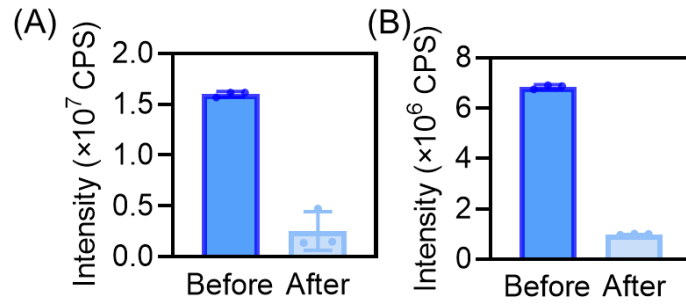

**Fig. S2.**

Membrane coating efficiency of RAW-PLGA nanodecoys. (A) Fluorescence intensity of RAW-DiD-PLGA nanodecoys ( $1 \text{ mg DiD-PLGA/mL}$ ) before and after centrifugation ( $10,000 \text{ g}$ ,  $10 \text{ min}$ ) ( $n = 3$ ). (B) Fluorescence intensity of DiD-RAW-PLGA nanodecoys ( $1 \text{ mg PLGA/mL}$ ) before and after centrifugation ( $10,000 \text{ g}$ ,  $10 \text{ min}$ ) ( $n = 3$ ).

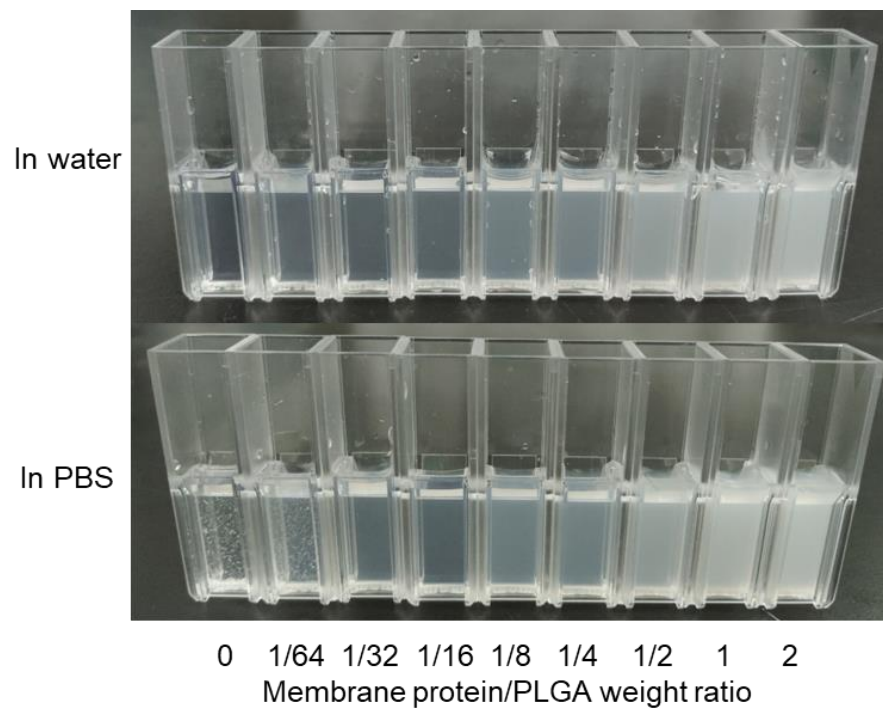

**Fig. S3.**

Images of RAW-PLGA nanodecoys in water or PBS at different membrane protein/PLGA weight ratios. Photo Credit: Yang Zhou, Institute of Functional Nano & Soft Materials (FUNSOM), Jiangsu Key Laboratory for Carbon-Based Functional Materials and Devices, Soochow University.

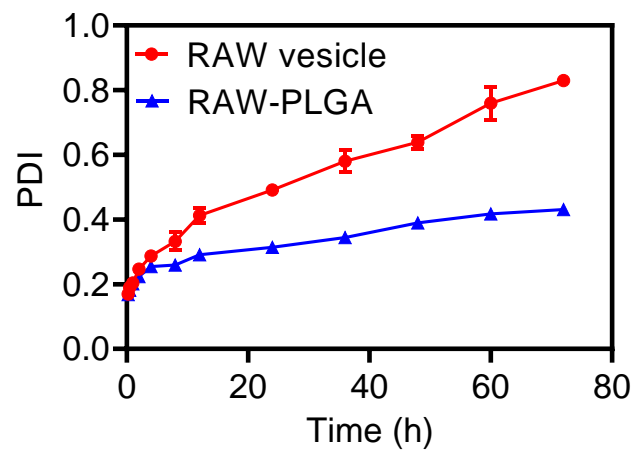

**Fig. S4.**

Alteration of the PDI of RAW vesicles and RAW-PLGA nanodecoys after incubation in DMEM containing 10% FBS for different time ( $n = 3$ ).

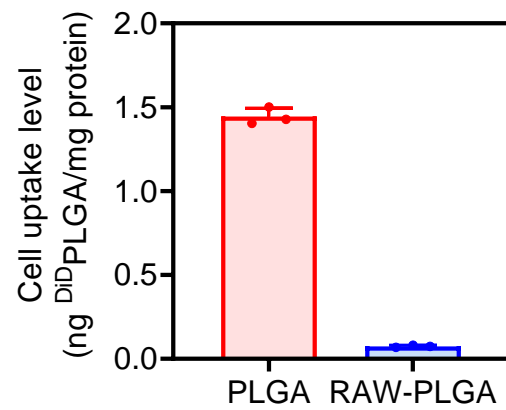

**Fig. S5.**

Uptake levels of  $\text{DiDPLGA}$  NPs and RAW- $\text{DiDPLGA}$  nanodecoys ( $100 \mu\text{g DiDPLGA/mL}$ ) in RAW 264.7 cells following incubation for 4 h ( $n = 3$ ).

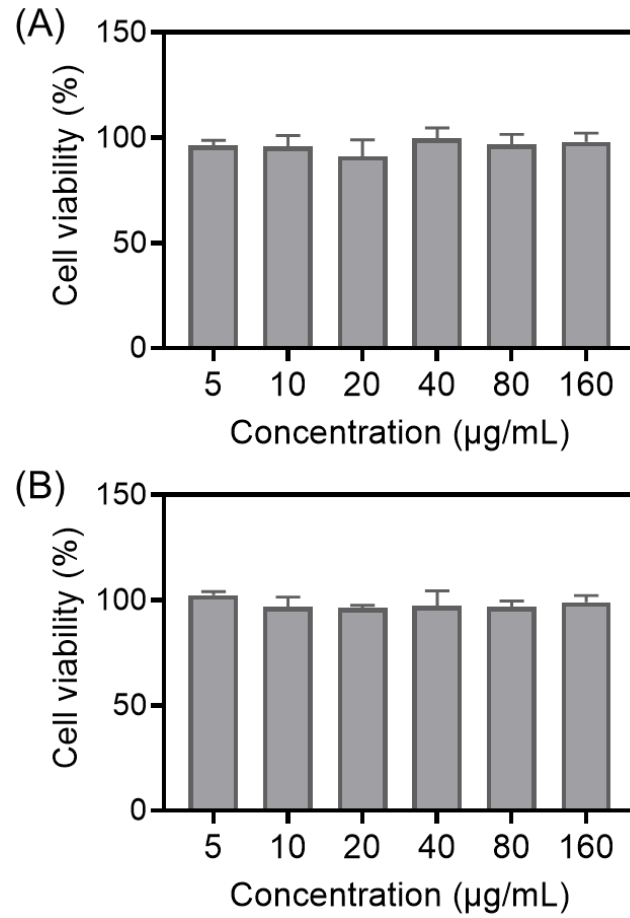

**Fig. S6.**

Viability of RAW 264.7 cells (A) and MC3T3-E1 cells (B) following 24-h incubation with RAW-PLGA nanodecoys at various PLGA concentrations ( $n = 3$ ).

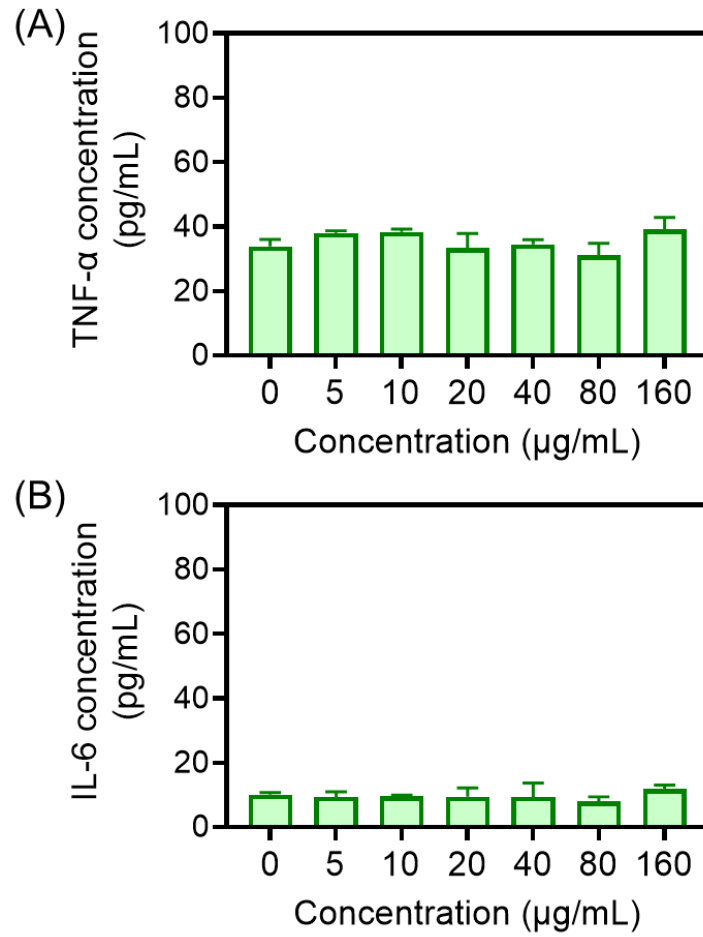

**Fig. S7.**

Immunostimulatory properties of RAW-PLGA nanodecoys. TNF- $\alpha$  (A) and IL-6 (B) secretion levels of RAW 264.7 cells following 24-h incubation with RAW-PLGA nanodecoys at various PLGA concentrations ( $n = 3$ ).



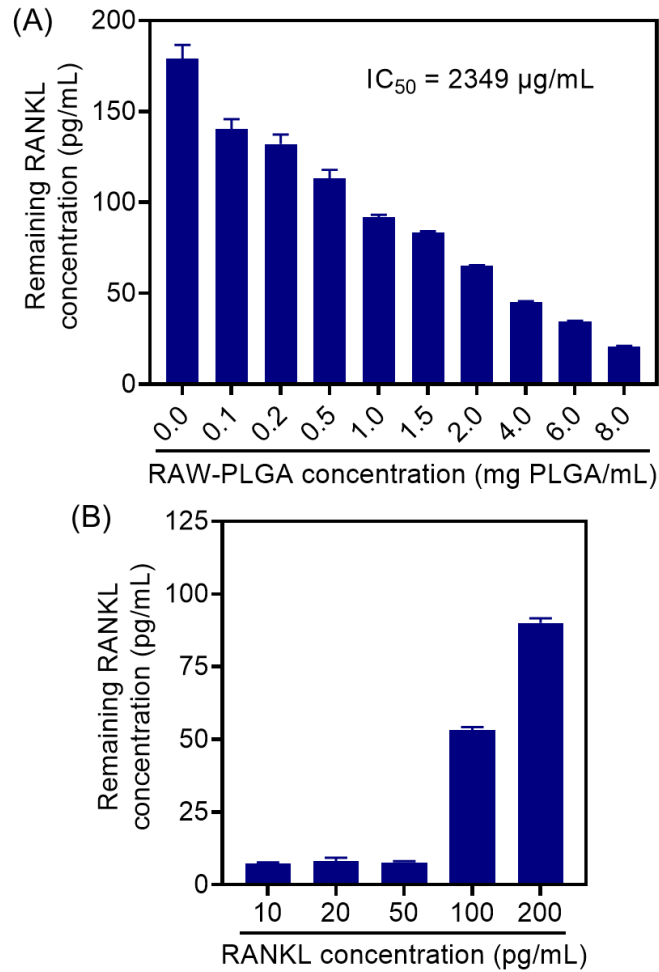

**Fig. S8.**

Dose-dependent scavenging of RANKL by RAW-PLGA nanodecoys. **(A)** RANKL scavenging efficiencies of RAW-PLGA nanodecoys at various concentrations when the RANKL concentration was maintained at 200 pg/mL ( $n = 3$ ). **(B)** RANKL scavenging efficiencies of RAW-PLGA nanodecoys (1 mg PLGA/mL) when the RANKL concentrations were varied from 10 to 200 pg/mL ( $n = 3$ ).

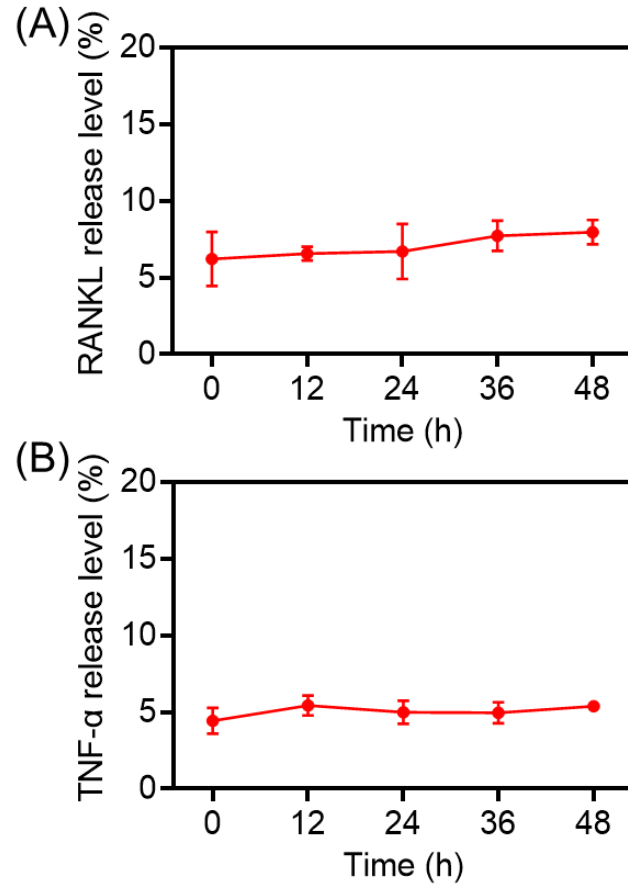

**Fig. S9.**

Cytokine release from the cytokine/RAW-PLGA complexes. Cumulative RANKL (A) or TNF- $\alpha$  (B) release from RAW-PLGA nanodecoys that had bound RANKL or TNF- $\alpha$  after incubation in DMEM containing 10% FBS for different time ( $n = 3$ ).

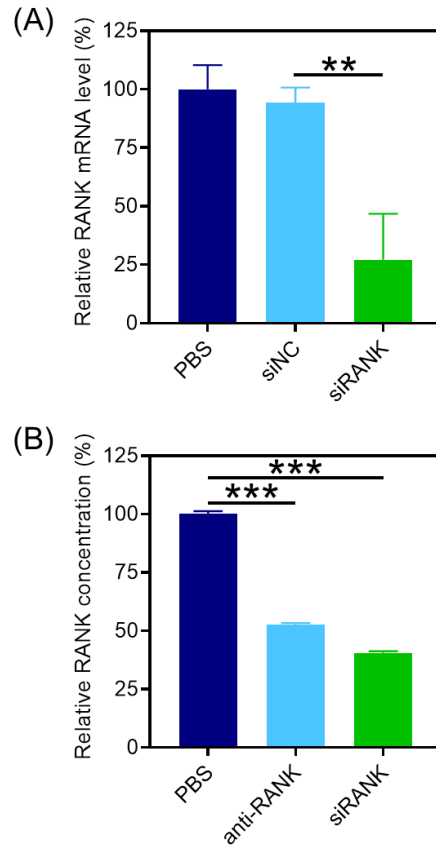

**Fig. S10.**

Down-regulation of the RANK level in RAW 264.7 cells after siRANK or anti-RANK treatment. **(A)** Relative RANK mRNA level in RAW 264.7 cells after incubation with different nanocomplexes (LPF2000/siNC and LPF2000/siRANK, w/w = 1:1) as determined by real-time PCR ( $n = 3$ ). **(B)** Relative RANK protein level in RAW 264.7 cells after incubation with PBS, anti-RANK, or LPF2000/siRANK nanocomplexes as determined by ELISA ( $n = 3$ ).

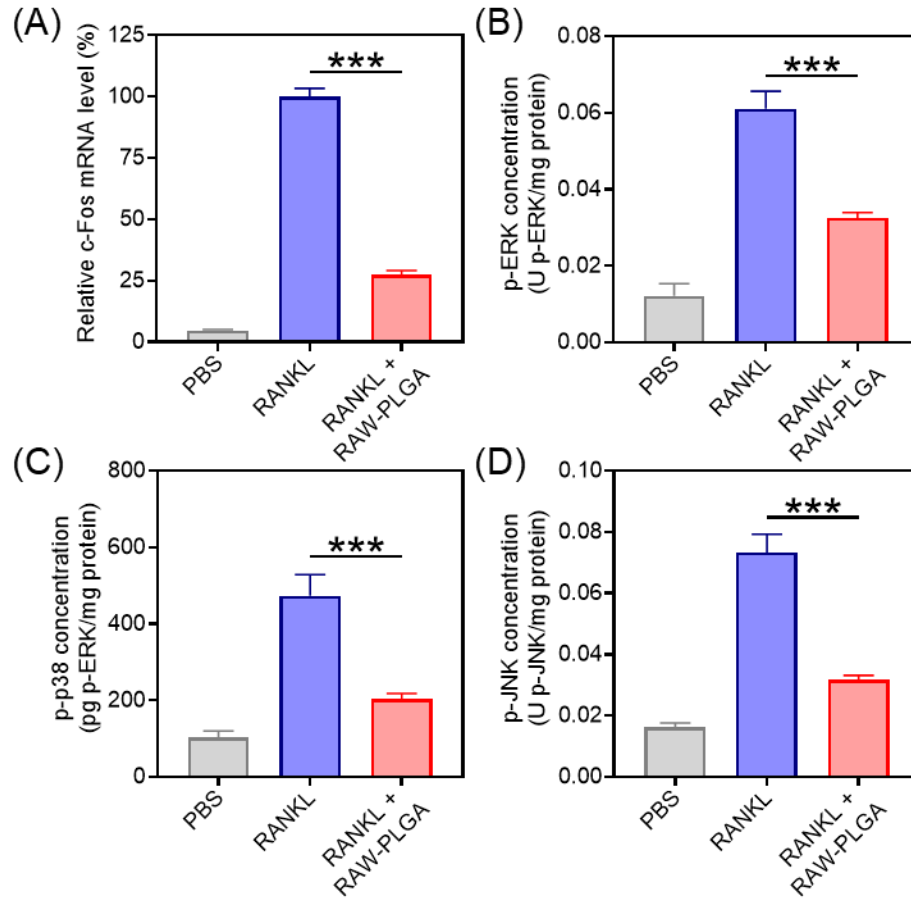

**Fig. S11.**

RAW-PLGA nanodecoys-mediated blocking of the NF- $\kappa$ B and MAPK pathways. Relative c-Fos mRNA level (A) and p-ERK (B), p-p38 (C), and p-JNK (D) levels in RAW 264.7 cells ( $n = 3$ ).

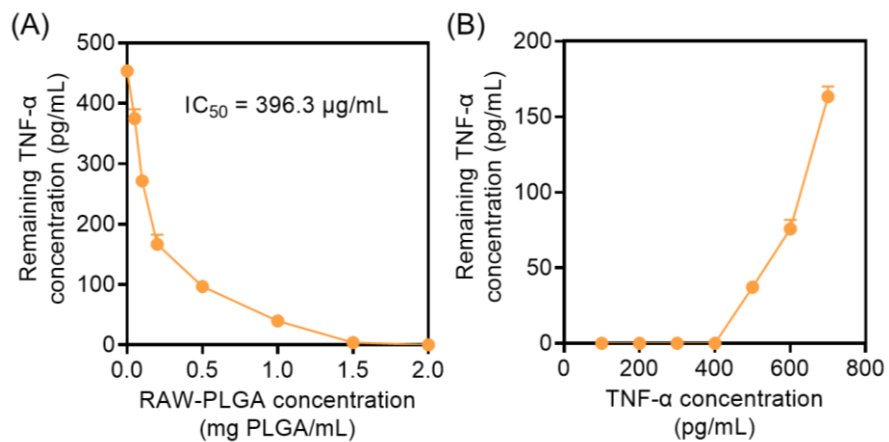

**Fig. S12.**

Dose-dependent scavenging of TNF- $\alpha$  by RAW-PLGA nanodecoys. (A) TNF- $\alpha$  scavenging efficiencies of RAW-PLGA nanodecoys at various concentrations when the TNF- $\alpha$  concentration was maintained at 500 pg/mL ( $n = 3$ ). (B) TNF- $\alpha$  scavenging efficiencies of RAW-PLGA nanodecoys (1 mg PLGA/mL) when the TNF- $\alpha$  concentrations were varied from 100 to 700 pg/mL ( $n = 3$ ).

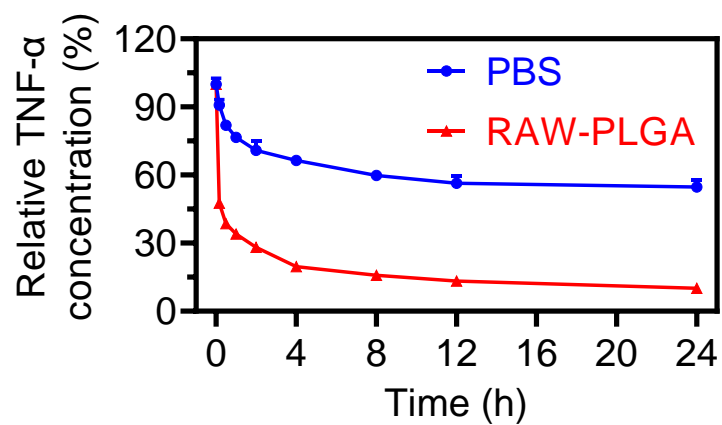

**Fig. S13.**

Extracellular TNF- $\alpha$  concentration of MC3T3-E1 cells after incubation with PBS or RAW-PLGA nanodecoys for different time at the initial TNF- $\alpha$  concentration of 100 ng/mL ( $n = 3$ ).

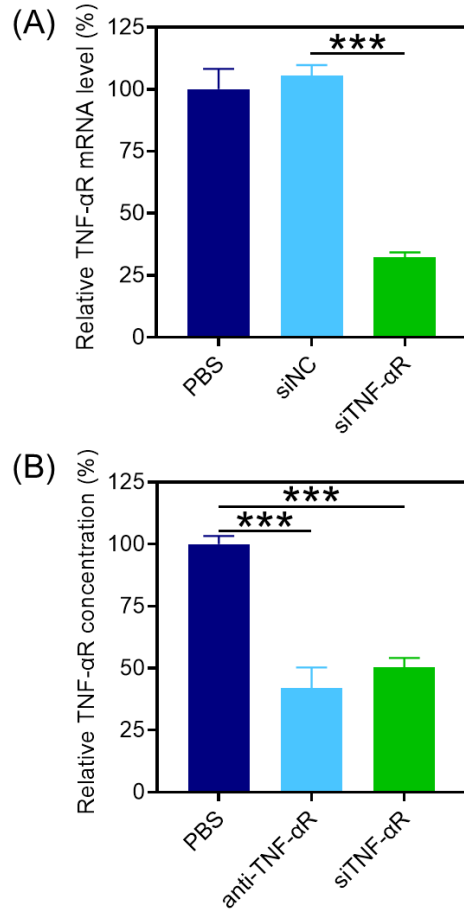

**Fig. S14.**

Down-regulation of the TNF-αR level in RAW 264.7 cells after siTNF-αR or anti-TNF-αR treatment. **(A)** Relative TNF-αR mRNA level in RAW 264.7 cells after incubation with different nanocomplexes (LPPF2000/siNC and LPPF2000/siTNF-αR, w/w = 1:1) as determined by real-time PCR ( $n = 3$ ). **(B)** Relative TNF-αR protein level in RAW 264.7 cells following treatment with LPPF2000/siTNF-αR nanocomplexes or anti-TNF-αR ( $n = 3$ ).

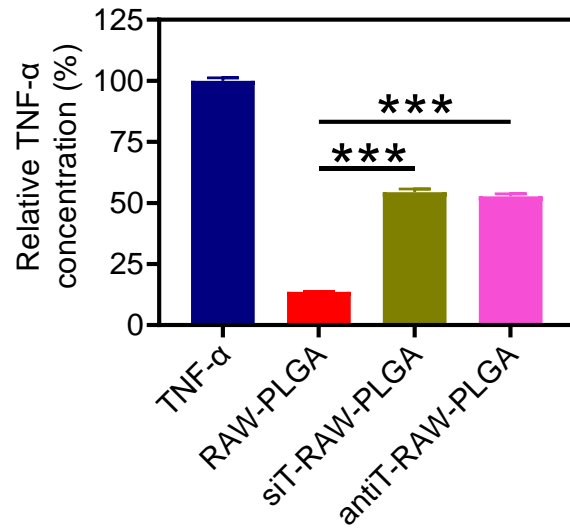

**Fig. S15.**

TNF- $\alpha$  scavenging efficiencies of RAW-PLGA nanodecoys, antiT-RAW-PLGA nanodecoys, and siT-RAW-PLGA nanodecoys at the initial TNF- $\alpha$  concentration of 500 pg/mL ( $n = 3$ ).



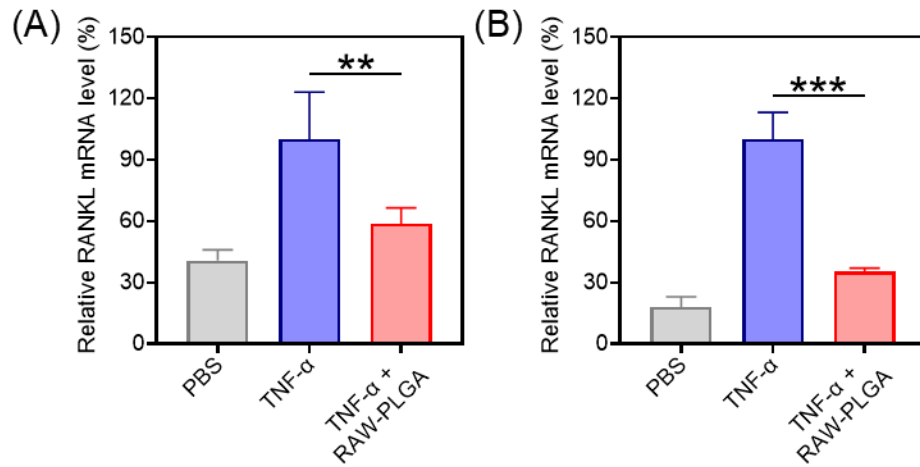

**Fig. S16.**

RAW-PLGA nanodecoys-mediated RANKL down-regulation after TNF- $\alpha$  challenge. Relative RANKL mRNA level in TNF- $\alpha$ -challenged RAW 264.7 cells (A) and MC3T3-E1 cells (B) following incubation with RAW-PLGA nanodecoys ( $n = 3$ ).

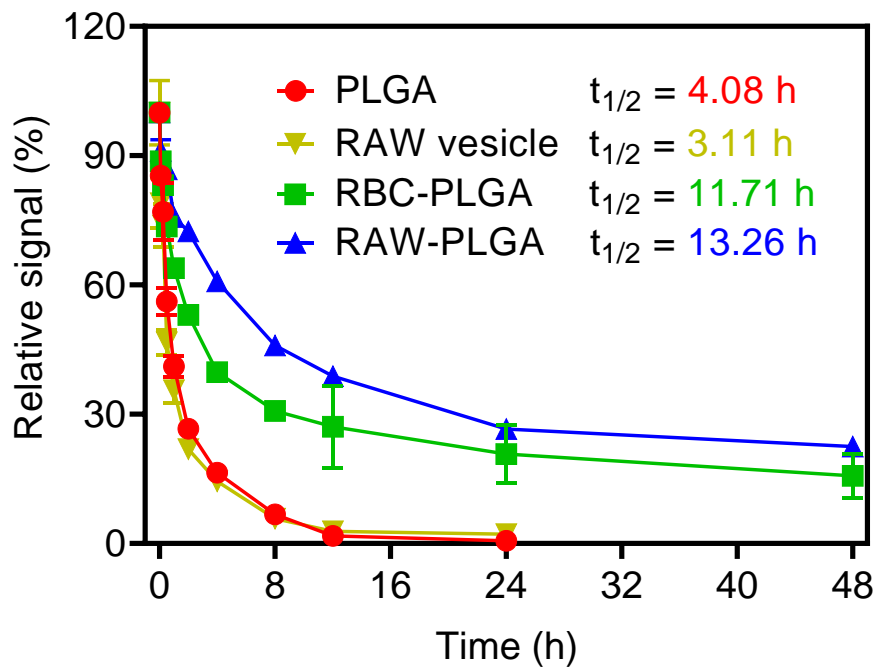

**Fig. S17.**

Pharmacokinetics of  $^{DiD}$ PLGA NPs,  $^{DiD}$ RAW vesicles, RBC- $^{DiD}$ PLGA NPs, or RAW- $^{DiD}$ PLGA nanodecoys in mice following *i.v.* injection at 10 mg  $^{DiD}$ PLGA/kg or 2.5 mg  $^{DiD}$ RAW vesicles/kg ( $n = 3$ ).

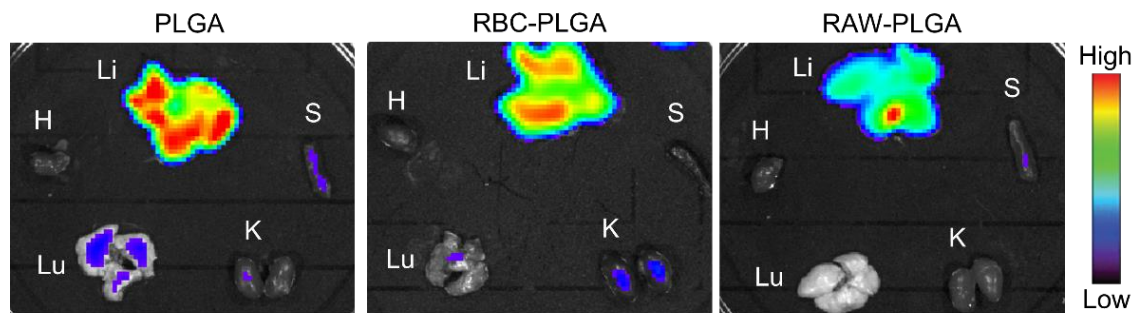

**Fig. S18.**

*Ex vivo* fluorescence imaging of excised major organs at 24 h post *i.v.* injection of  $^{DiD}$ PLGA NPs, RBC- $^{DiD}$ PLGA NPs, or RAW- $^{DiD}$ PLGA nanodecoys at 10 mg  $^{DiD}$ PLGA/kg (H: heart; Lu: lung; S: spleen; K: kidney; Li: liver).

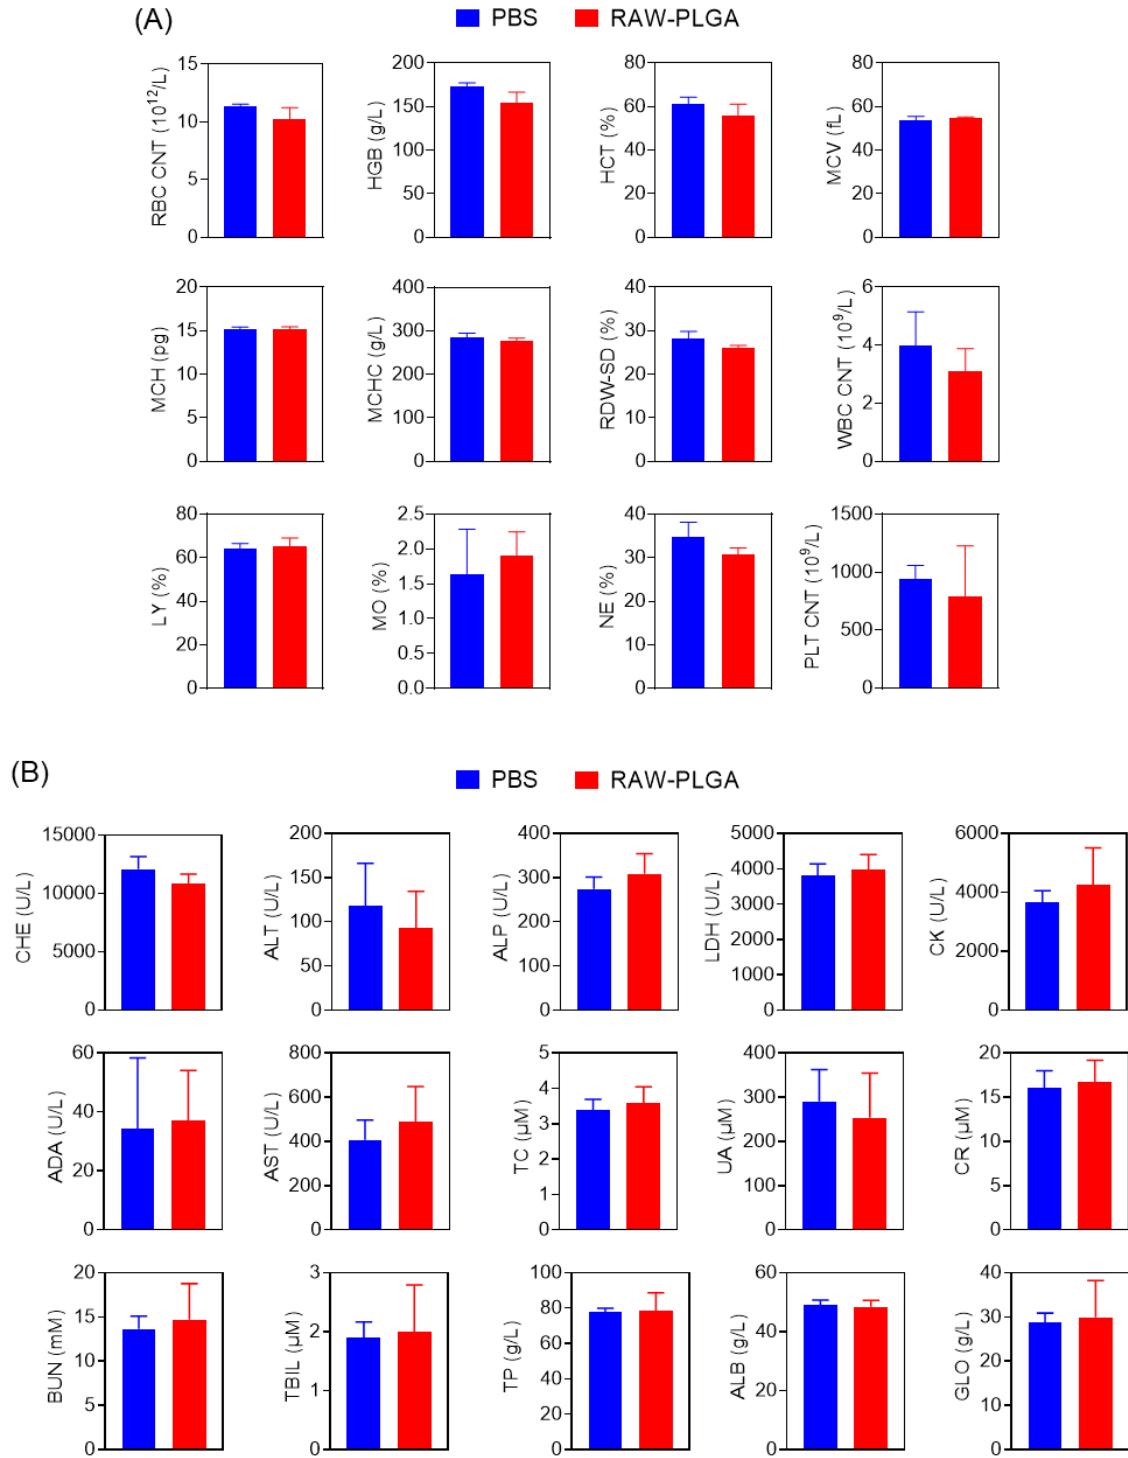

**Fig. S19.**

Biocompatibility of RAW-PLGA nanodecoys. Hematological **(A)** and biochemical **(B)** parameters of mice after *i.v.* injection of PBS and RAW-PLGA nanodecoys (10 mg/kg) ( $n = 3$ ).

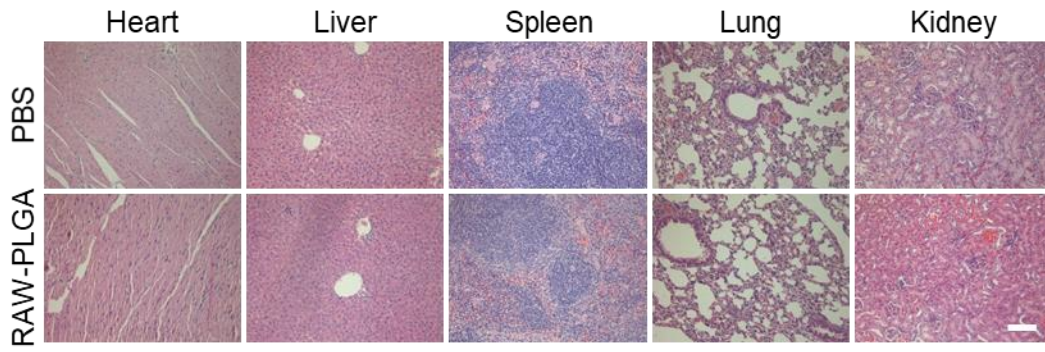

**Fig. S20.**

H&E-stained major organ sections of mice after *i.v.* injection of PBS or RAW-PLGA nanodecoys (10 mg PLGA/kg) (scale bar = 100  $\mu$ m).

**Table S1.**

Sequences of primers used for the real-time PCR analysis.

| Primers         | Forward                          | Reverse                          |
|-----------------|----------------------------------|----------------------------------|
| RANK            | 5'-AGATGTGGTCTGCAGCTCTCCAT-3'    | 5'-ACACACTTCTTGCTGACTGGAGGT-3'   |
| TNF- $\alpha$ R | 5'-GGAAAGTATGTCCATTCTAAGAACAA-3' | 5'-GTCACTCACCAAGTAGGTTCTT-3'     |
| c-Fos           | 5'-TTTCAACGCGGACTACGAGG-3'       | 5'-GCGCAAAAGTCCTGTGTGTT-3'       |
| RANKL           | 5'-CAGAAGGAACTGCAACACAT-3'       | 5'-CAGAGTGACTTTTATGGGAACC-3'     |
| TNF- $\alpha$   | 5'-TGATCCGAGATGTGGAAGT-3'        | 5'-CGAGCAGGAATGAGAAGAGG-3'       |
| IL-6            | 5'-CAATCTGGGTTCAATCAGGCGAT-3'    | 5'-GCATCTTCTCCAGCAGGTCAG-3'      |
| IL-1 $\beta$    | 5'-CCCAAGCAATACCCAAAGAA-3'       | 5'-GCTTGTGCTCTGCTTGTGAG-3'       |
| RUNX2           | 5'-GGCAGTTCCCAAGCATTTC-3'        | 5'-GGTAAAGGTGGCTGGGTAGT-3'       |
| OSX             | 5'-CCTCTCGACCCGACTGCAGATC-3'     | 5'-AGCTGCAAGCTCTCTGTAACCATGAC-3' |
| OSC             | 5'-AAGCAGGAGGGCAATAAGGT-3'       | 5'-CAAGCAGGGTTAAGCTCACA-3'       |
| TRAF6           | 5'-TTGCACATTCAGTGTTTTGG-3'       | 5'-TGCAAGTGTCGTGCCAAG-3'         |
| NFATc1          | 5'-CCGTTGCTTCCAGAAAATAACA-3'     | 5'-TGTGGGATGTGAACTCGGAA-3'       |
| ctsK            | 5'-AGCGAACAGATTCTCAACAGC-3'      | 5'-AGACAGAGCAAAGCTCACCAT-3'      |
| TRAP            | 5'-CGTCTCTGCACAGATTGCAT-3'       | 5'-AAGCGCAAACGGTAGTAAGG-3'       |
| RECK            | 5'-CTCCAGCAGTCTCCCGTCAT-3'       | 5'-GTTGTGGGTGGTCAGGGTCTA-3'      |
| MMP-2           | 5'-GCAATACCTGAACACTTTCTATG-3'    | 5'-TCTGGTCAAGGTCACCTGTC-3'       |
| MMP-9           | 5'-TGGCAGAGGCATACTTGTACC-3'      | 5'-TGTCCAGCTCACCAGTCT-3'         |
| MMP-13          | 5'-CTGGACCAAACACTATGGTGGG-3'     | 5'-GGTCCTTGGAGTGATCCAGA-3'       |
| GAPDH           | 5'-TTCACCACCATGGAGAAGGC-3'       | 5'-GGCATGGACTGTGGTCATGA-3'       |

**Table S2.**

Abbreviations of various hematological parameters.

| Full name                                               | Abbreviation |
|---------------------------------------------------------|--------------|
| Red blood cell count                                    | RBC CNT      |
| Hemoglobin                                              | HGB          |
| Hematocrit                                              | HCT          |
| Mean corpuscular volume                                 | MCV          |
| Mean corpuscular hemoglobin                             | MCH          |
| Mean corpuscular hemoglobin concentration               | MCHC         |
| Standard deviation of red blood cell distribution width | RDW-SD       |
| White blood cell count                                  | WBC CNT      |
| % lymphocyte                                            | LY           |
| % monocyte                                              | MO           |
| % neutrophil                                            | NE           |
| Platelet count                                          | PLT CNT      |

**Table S3.**

Abbreviations of various biochemical parameters.

| Full name                   | Abbreviation |
|-----------------------------|--------------|
| Cholinesterase              | CHE          |
| Alanine aminotransferase    | ALT          |
| Alkaline phosphatase        | ALP          |
| Lactate dehydrogenase       | LDH          |
| Creatine kinase             | CK           |
| Adenosine deaminase         | ADA          |
| Aspartate amino transferase | AST          |
| Total cholesterol           | TC           |
| Uric acid                   | UA           |
| Creatinine                  | CR           |
| Blood urea nitrogen         | BUN          |
| Total bilirubin             | TBIL         |
| Total protein               | TP           |
| Albumin                     | ALB          |
| Globulin                    | GLO          |
